# Supplementary material for: Effectiveness of Comirnaty® Vaccine and Correlates of Immunogenicity and Adverse Reactions: A Single-Center Prospective Case Series Study
Source: MDPI journal article supplement (doi:10.3390/vaccines10081170), 2022-07-22
Supplement: s1 [file s1]

**Supplementary Table S1.** Comparison of adverse reactions after propensity score matching by the number of doses of BNT162b2 (Pfizer/BioNTech) vaccine (Conmirnaty<sup>®</sup>) vaccine administered.

| Type               | Symptom                 | Presence of Symptoms One-Dose<br>Participants (n = 106)<br>n (%) | Presence of Symptoms Two-Dose<br>Participants (n = 106)<br>n (%) | p Value |
|--------------------|-------------------------|------------------------------------------------------------------|------------------------------------------------------------------|---------|
| Local Reactions    | Injection site Pain     | 47 (44.3)                                                        | 23 (21.6)                                                        | <0.05   |
|                    | Injection site Redness  | 20 (18.8)                                                        | 19 (17.9)                                                        | >0.05   |
|                    | Injection site Swelling | 20 (18.8)                                                        | 14 (13.3)                                                        | >0.05   |
| Systemic Reactions | Chills or shivering     | 18 (17.0)                                                        | 14 (13.3)                                                        | >0.05   |
|                    | Fatigue or tiredness    | 24 (22.5)                                                        | 16 (15.0)                                                        | >0.05   |
|                    | Muscle aches or pains   | 30 (28.2)                                                        | 19 (17.9)                                                        | >0.05   |
|                    | Headache                | 30 (28.2)                                                        | 22 (20.7)                                                        | >0.05   |
|                    | Joint pains             | 15 (14.0)                                                        | 11 (10.3)                                                        | >0.05   |
|                    | Vomiting or Nauseous    | 9 (8.4)                                                          | 5 (4.6)                                                          | >0.05   |
|                    | Diarrhea                | 11 (10.0)                                                        | 7 (6.5)                                                          | >0.05   |
|                    | Fever ( $\geq 38.0$ °C) | 4 (3.2)                                                          | 1 (0.9)                                                          | >0.05   |
